# Supplementary material for: Evaluation of Generative Adversarial Networks for High-Resolution Synthetic Image Generation of Circumpapillary Optical Coherence Tomography Images for Glaucoma
Source: PubMed Central journal article supplement (PMC9437828; doi:10.1001/jamaophthalmol.2022.3375), 2022-09-01
Supplement: jamaophthalmol-e223375-s001.pdf [file jamaophthalmol-e223375-s001.pdf]

## Supplemental Online Content

Kumar AJS, Chong RS, Crowston JG, et al. Evaluation of generative adversarial networks for high-resolution synthetic image generation of circumpapillary optical coherence tomography images for glaucoma. *JAMA Ophthalmol*. Published online September 1, 2022. doi:10.1001/jamaophthalmol.2022.3375

**eTable 1.** Summary of the Study Participants

**eTable 2.** Summary of Data used for Training Deep Learning Glaucoma Detection Models

**eTable 3.** Summary of Search Terms

**eFigure 1.** Workflow of the study

**eFigure 2.** Real and synthetic circumpapillary OCT images of normal eyes

**eFigure 3.** Distribution of the extracted circumpapillary RNFL thicknesses from the (a) real normal and real glaucoma images used for GAN training, and (b) synthetic 100,000 normal and synthetic 100,000 glaucoma images generated from the normal and glaucoma GAN models respectively

**eFigure 4.** Class Activation Maps of the glaucoma detection models

This supplemental material has been provided by the authors to give readers additional information about their work.

**eTable 1. Summary of the Study Participants**

| <b>Study Site</b>                 | <b>Singapore</b>     |                 | <b>Bucharest</b>          |                 |
|-----------------------------------|----------------------|-----------------|---------------------------|-----------------|
| <b>Ethnicity</b>                  | <b>Asian Chinese</b> |                 | <b>Non-Hispanic White</b> |                 |
| <b>Participants</b>               | <b>Healthy</b>       | <b>Glaucoma</b> | <b>Healthy</b>            | <b>Glaucoma</b> |
| <b>Eyes / Participants</b>        | 1144 / 806           | 1144 / 728      | 150 / 83                  | 150 / 77        |
| <b>Sex, male</b>                  | 418 (51.9%)          | 485 (66.6%)     | 55 (66.3%)                | 50 (64.9%)      |
| <b>Age, years</b>                 | 54.1±7.1             | 65.1±9.1        | 39.1±11.1                 | 64.7±11.1       |
| <b>Refractive Error (D)</b>       | -0.9±2.3             | 0.6±3.1         | 0.0±2.0                   | 0.3±1.1         |
| <b>Average RNFL thickness(μm)</b> | 103.8±11.9           | 76.6±14.5       | 103.1 ±8.7                | 83.6 ± 17.7     |
| <b>Mean Deviation (dB)</b>        | -                    | -6.5±5.6        | -                         | -4.7±5.7        |
| <b>Mild</b>                       | -                    | 607 (53.1)      | -                         | 108 (72.0)      |
| <b>Moderate</b>                   | -                    | 254 (22.2)      | -                         | 25 (16.7)       |
| <b>Advanced</b>                   | -                    | 155 (13.5)      | -                         | 17 (11.3)       |

D = Diopters; RNFL = Retinal Nerve Fiber Thickness; dB = Decibels. Sex was self-reported. Refractive error was provided by the spherical equivalent, which was calculated as the sum of the spherical value with half the cylinder value. Data presented as mean±standard deviation or number (%), as appropriate.

**eTable 2. Summary of Data used for Training Deep Learning Glaucoma Detection Models**

| Image Type                                  | Real             |                 | Synthetic        |                 | Synthetic        |                 | Synthetic        |                 | Synthetic        |                 |
|---------------------------------------------|------------------|-----------------|------------------|-----------------|------------------|-----------------|------------------|-----------------|------------------|-----------------|
|                                             | Normal           | Glaucoma        | Normal           | Glaucoma        | Healthy          | Glaucoma        | Healthy          | Glaucoma        | Healthy          | Glaucoma        |
| <b>N</b>                                    | 600              | 600             | 600              | 600             | 5000             | 5000            | 30000            | 30000           | 100000           | 100000          |
| <b>FID</b>                                  | -                | -               | 16.78            | 15.64           | 16.39            | 12.51           | 15.92            | 12.24           | 15.84            | 12.02           |
| <b>Mean RNFL (<math>\mu\text{m}</math>)</b> | 102.7 $\pm$ 10.5 | 76.2 $\pm$ 14.3 | 104.1 $\pm$ 11.6 | 77.9 $\pm$ 13.4 | 104.7 $\pm$ 11.4 | 78.1 $\pm$ 13.2 | 104.5 $\pm$ 11.6 | 78.2 $\pm$ 13.3 | 104.7 $\pm$ 11.6 | 78.2 $\pm$ 13.4 |
| <b>Min RNFL (<math>\mu\text{m}</math>)</b>  | 62.8             | 34.1            | 71.6             | 43.3            | 55.9             | 38.14           | 49.1             | 33.3            | 50.9             | 32.3            |
| <b>Max RNFL (<math>\mu\text{m}</math>)</b>  | 134.5            | 119.9           | 139.2            | 116.3           | 140.1            | 131.35          | 143.3            | 135.3           | 147.2            | 134.9           |
| <b>N<sub>2SD</sub></b>                      | 26 (4.3%)        | 29 (4.8%)       | 33 (5.5%)        | 27 (4.5%)       | 248 (4.1%)       | 208 (3.5%)      | 1487 (2.5%)      | 1304 (2.2%)     | 4915 (8.2%)      | 4242 (7.1%)     |

FID = Frechet Inception Distance; RNFL = Retinal Nerve Fiber Thickness; N<sub>2SD</sub> = Number of images more than 2 standard deviations from the mean.

Data presented as mean  $\pm$  standard deviation or number (%), as appropriate.

**eTable 3. Summary of Search Terms**

Databases: Google Scholar, PubMed, Semantic Scholar, arXiv

| <b>Topic</b>                                                        | <b>Search Items</b>                                                                         |
|---------------------------------------------------------------------|---------------------------------------------------------------------------------------------|
| GANs for synthetic Images of optic nerve OCT in glaucoma            | GAN, generative adversarial network, synthetic, OCT, optic nerve head, optic disc, glaucoma |
| GANs for synthetic Images of OCTs for retinal disease in the macula | GAN, generative adversarial network, synthetic, OCT, macula, retina, retinal disease        |
| GANs in ophthalmology                                               | GAN, generative adversarial network, synthesis, ophthalmology, OCT, fundus                  |

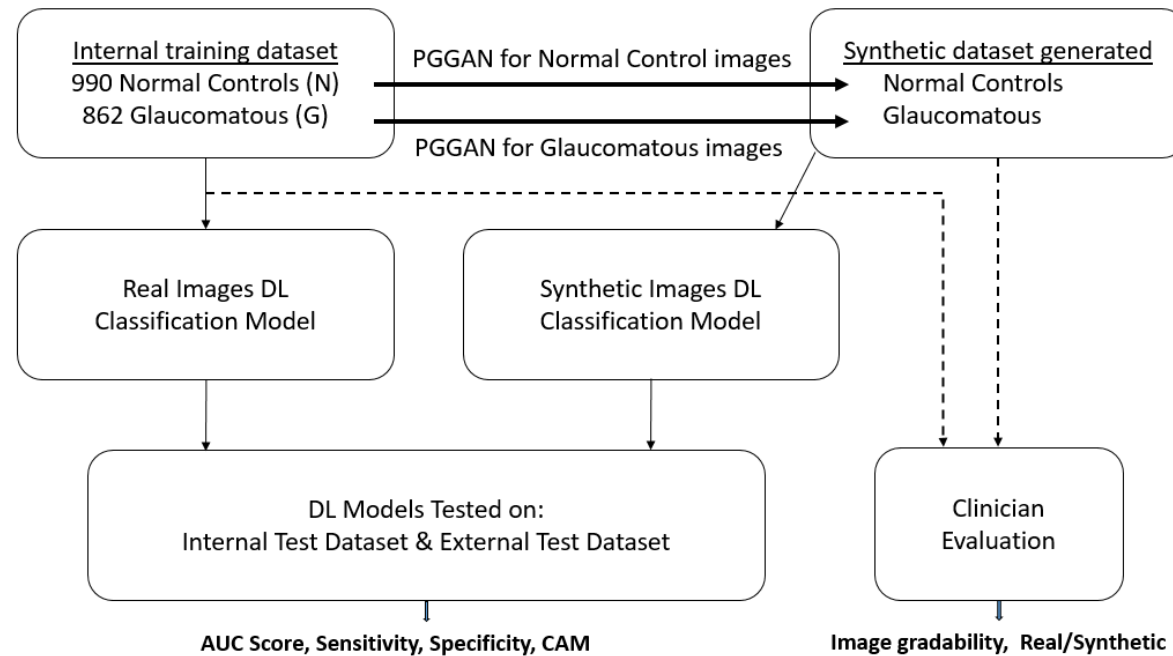

**eFigure 1. Workflow of the study.** Two separate PGGAN models were developed using real images to generate normal and glaucoma circumpapillary images. The generated images were evaluated by clinicians for gradeability and authenticity, and also used to train deep learning-based glaucoma detection models. Performance of the DL models were evaluated on internal test set and on an independent test set of data collected at a different study site. Results were compared with glaucoma detection based on global retinal nerve fiber layer thickness and a DL model trained on real data. (PGGAN = Progressively Growing Generative Adversarial Model; DL = Deep Learning; AUC: Area Under the Curve; CAM: Class Activation Map)

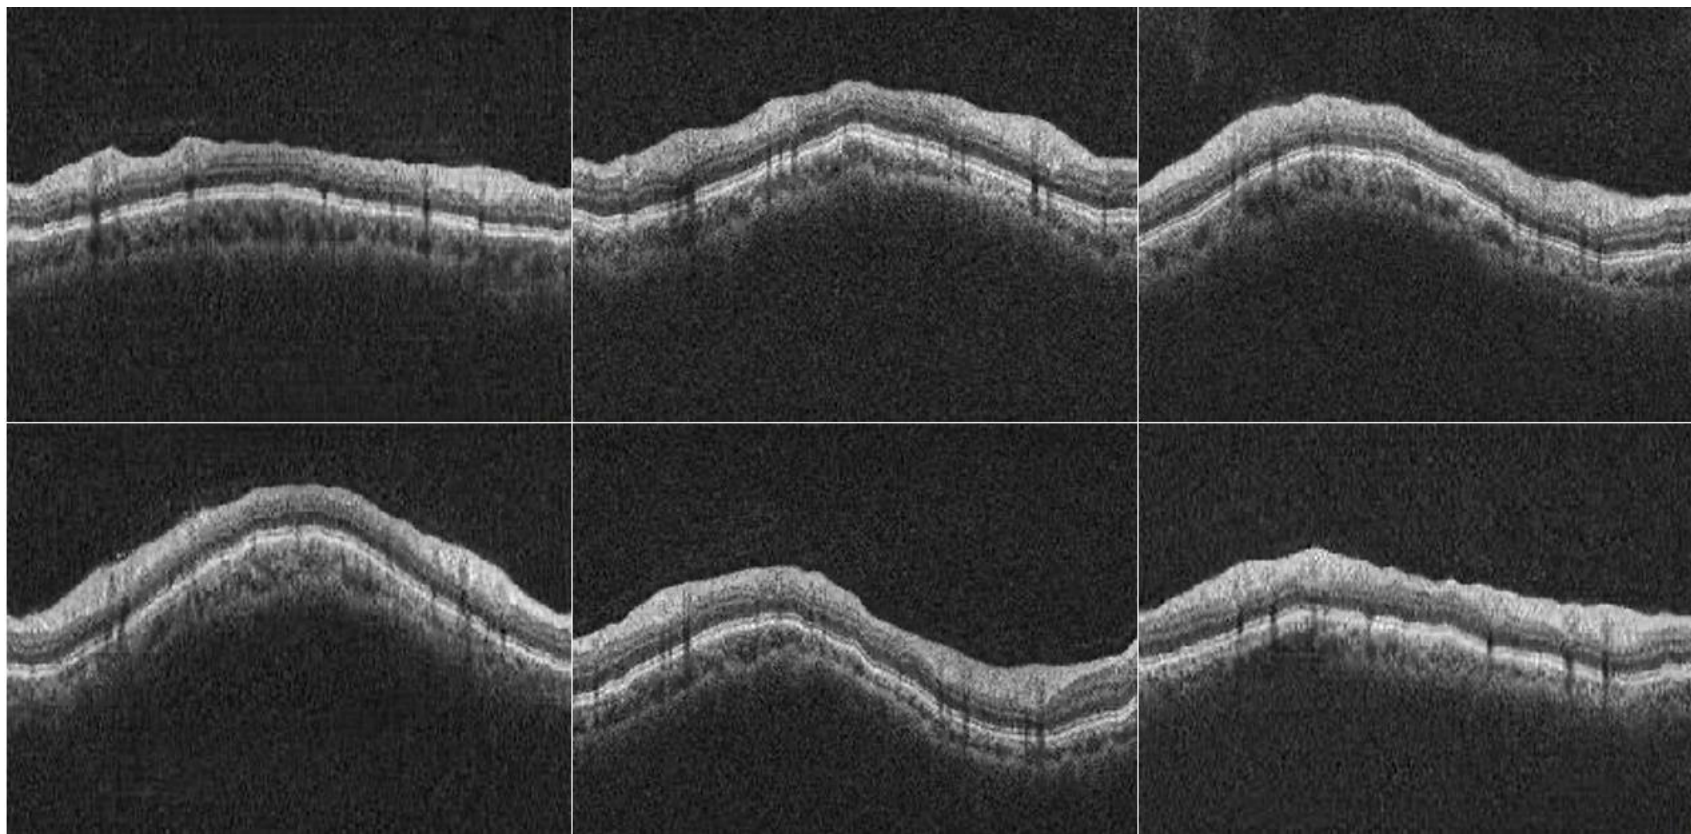

**eFigure 2. Real and synthetic circumpapillary OCT images of normal eyes.**

Circumpapillary OCT images of real normal eyes are located at first row, left; first row, centre and second row, right. All other images were synthetically generated from the GAN model for normal eyes.

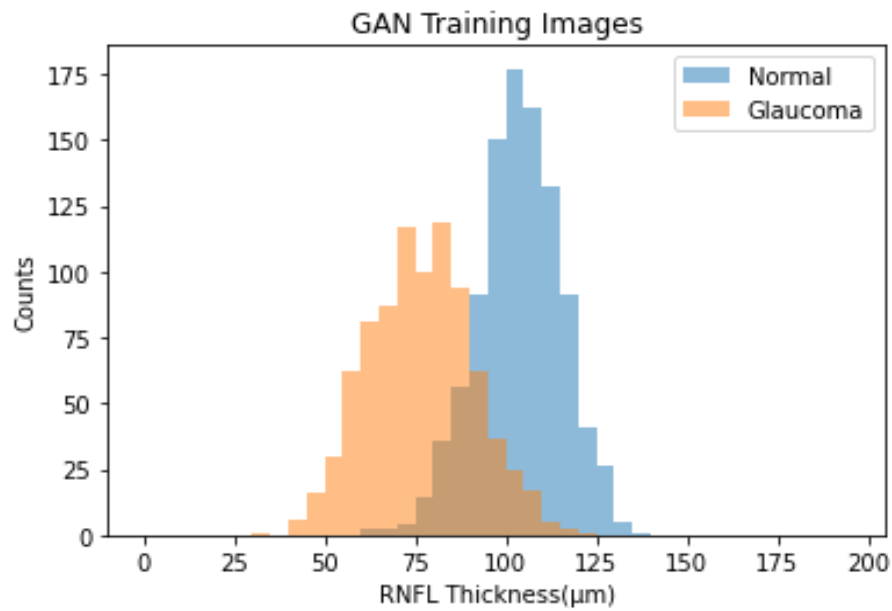

(a)

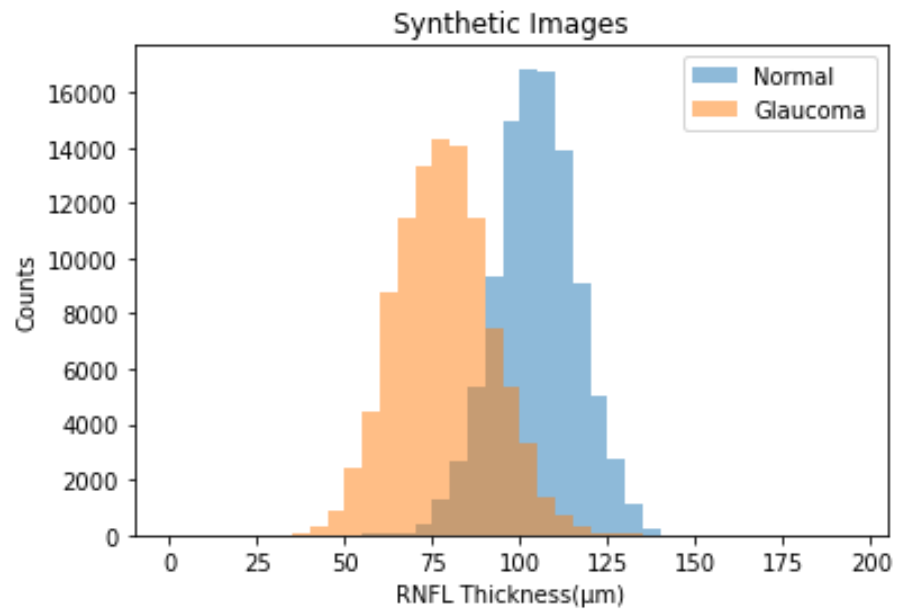

(b)

**eFigure 3. Distribution of the extracted circumpapillary RNFL thicknesses from the (a) real normal and real glaucoma images used for GAN training, and (b) synthetic 100,000 normal and synthetic 100,000 glaucoma images generated from the normal and glaucoma GAN models respectively.**

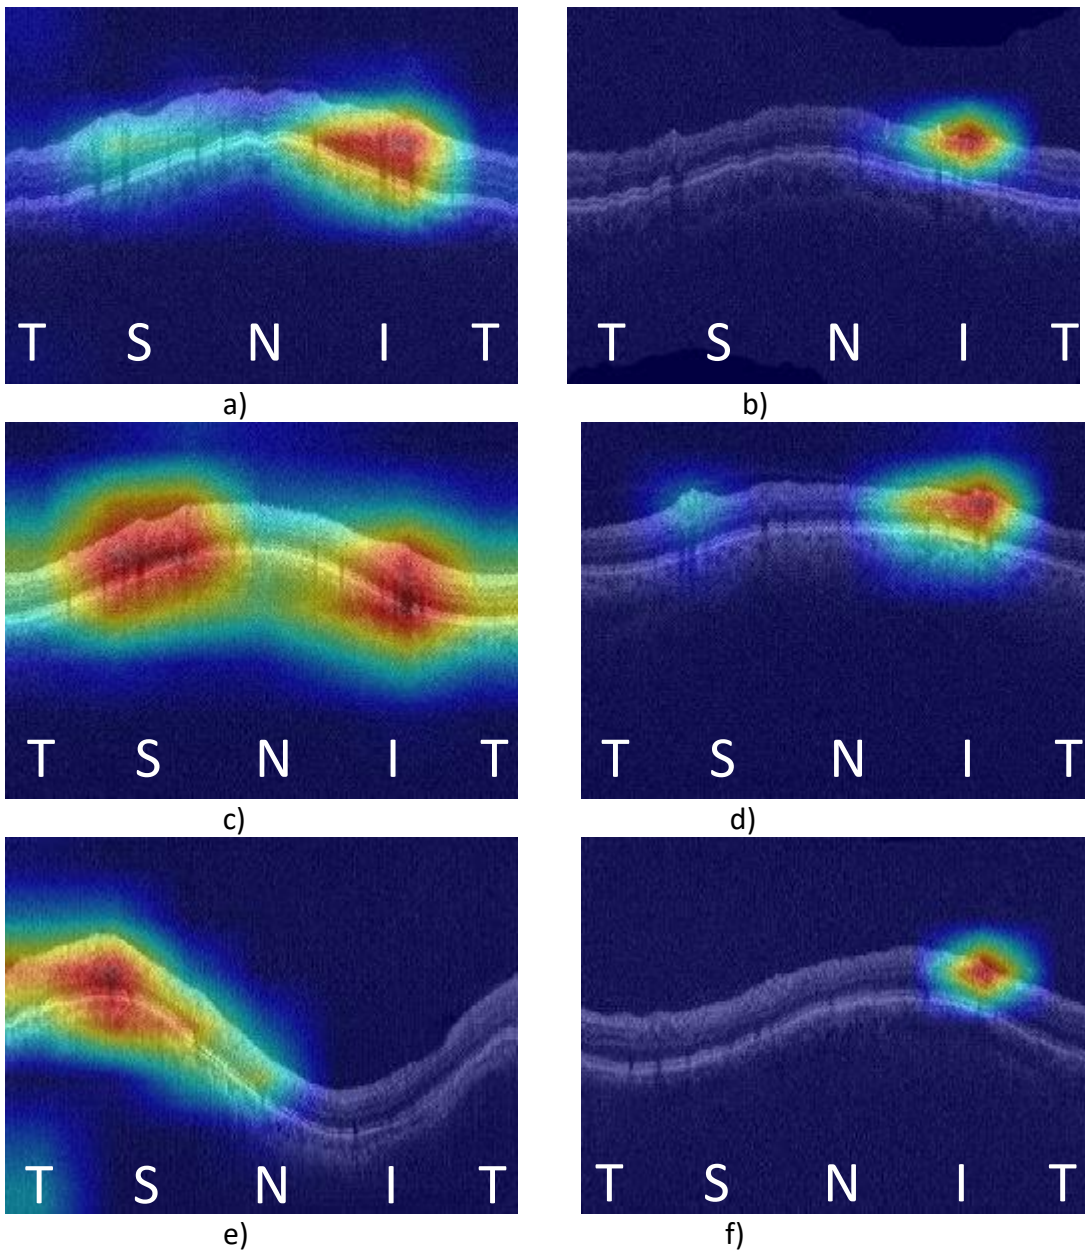

**eFigure 4. Class Activation Maps of the glaucoma detection models.** Class activation map samples for validating the performance of synthetic images classifier model on the internal test dataset (1<sup>st</sup> row), external test dataset (2<sup>nd</sup> row), and synthetic images test dataset (3<sup>rd</sup> row). 1<sup>st</sup> column is for normal controls and 2<sup>nd</sup> column is for glaucomatous eyes. Red highlighted regions correspond to the pixels that mostly contributed to the classification of images as normal controls or glaucomatous eyes. (T = Temporal, S = Superior, N = Nasal, I = Inferior)
